# Supplementary material for: Evaluation of HIV Transmission Clusters among Natives and Foreigners Living in Italy
Source: MDPI journal article supplement (doi:10.3390/v12080791), 2020-07-23
Supplement: s1 [file s1]

# Supplementary Materials: Evaluation of HIV Transmission Clusters Among Natives and Foreigners Living in Italy

Lavinia Fabeni, Maria Mercedes Santoro, Patrizia Lorenzini, Stefano Rusconi, Nicola Gianotti, Andrea Costantini, Loredana Sarmati, Andrea Antinori, Francesca Ceccherini-Silberstein, Antonella d'Arminio Monforte, Annalisa Saracino, Enrico Girardi

**Table S1.** Characteristics of foreign individuals with HIV-1 living in Italy.

| Variables                                 | Overall        | Out of cluster | In cluster | <i>p</i> -value <sup>a</sup> |
|-------------------------------------------|----------------|----------------|------------|------------------------------|
|                                           | <i>n</i> = 695 | 613 (88.2%)    | 82 (11.8%) |                              |
| Male gender, <i>n</i> (%)                 | 457 (65.8%)    | 383 (62.5%)    | 74 (90.2%) | <0.001                       |
| Age, years, median (IQR)                  | 34 (28–40)     | 34 (28–40)     | 29 (26–37) | 0.008                        |
| Mode of HIV transmission, <i>n</i> (%)    |                |                |            |                              |
| F heterosexual                            | 209 (30.0%)    | 201 (32.8%)    | 8 (9.8%)   | <0.001                       |
| F IVDU                                    | 9 (1.3%)       | 9 (1.5%)       | 0 (0.0%)   |                              |
| M heterosexual                            | 134 (19.3%)    | 125 (20.4%)    | 9 (11.0%)  |                              |
| M IVDU                                    | 25 (3.6%)      | 23 (3.8%)      | 2 (2.4%)   |                              |
| MSM                                       | 243 (35.0%)    | 187 (30.4%)    | 56 (68.3%) |                              |
| Other/unknown                             | 75 (10.8%)     | 68 (11.1%)     | 7 (8.5%)   |                              |
| Nation of birth, <i>n</i> (%)             |                |                |            |                              |
| Africa                                    | 219 (31.5%)    | 212 (34.6%)    | 7 (8.5%)   | <0.001                       |
| Central and South America                 | 241 (34.7%)    | 201 (32.8%)    | 40 (48.8%) |                              |
| Europe                                    | 187 (26.9%)    | 159 (25.9%)    | 28 (34.2%) |                              |
| Asia                                      | 38 (5.5%)      | 35 (5.7%)      | 3 (3.7%)   |                              |
| Other                                     | 10 (1.4%)      | 6 (1.0%)       | 4 (4.8%)   |                              |
| Education, <i>n</i> (%)                   |                |                |            |                              |
| Years in Italy, median (IQR)              | 5 (1–9)        | 5 (1–10)       | 7 (3–9)    | 0.488                        |
| Primary school                            | 179 (11.4%)    | 73 (11.9%)     | 6 (7.3%)   | 0.236                        |
| Secondary school                          | 126 (18.1%)    | 114 (18.6%)    | 12 (14.6%) |                              |
| College/University                        | 223 (32.1%)    | 188 (30.7%)    | 35 (42.7%) |                              |
| Unknown                                   | 267 (38.4%)    | 238 (38.8%)    | 29 (35.4%) |                              |
| Employment, <i>n</i> (%)                  |                |                |            |                              |
| Employed                                  | 217 (31.2%)    | 188 (30.7%)    | 29 (35.4%) | 0.206                        |
| Unemployed                                | 176 (25.3%)    | 158 (25.8%)    | 18 (22.0%) |                              |
| Self-employed                             | 73 (10.4%)     | 61 (9.9%)      | 12 (14.6)  |                              |
| Student                                   | 15 (2.2%)      | 11 (1.8%)      | 4 (4.9%)   |                              |
| Housewife                                 | 29 (4.2%)      | 28 (4.5%)      | 1 (1.2%)   |                              |
| Other                                     | 74 (10.7%)     | 66 (10.8%)     | 8 (9.8%)   |                              |
| Unknown                                   | 111 (16.0%)    | 101 (16.5%)    | 10 (12.1%) |                              |
| HIV RNA, copies/mL, <i>n</i> (%)          |                |                |            |                              |
| <1000                                     | 38 (5.5%)      | 32 (5.2%)      | 6 (7.3%)   | 0.362                        |
| 1000–10,000                               | 145 (20.9%)    | 127 (20.7%)    | 18 (22.0%) |                              |
| 10,000–100,000                            | 257 (37.0%)    | 221 (36.1%)    | 36 (43.9%) |                              |
| >100,000                                  | 213 (30.6%)    | 195 (31.8%)    | 18 (22.0%) |                              |
| Unknown                                   | 42 (6.0%)      | 38 (6.2%)      | 4 (4.9%)   |                              |
| CD4, cells/mm <sup>3</sup> , <i>n</i> (%) |                |                |            |                              |
| ≤200                                      | 195 (28.0%)    | 188 (30.7%)    | 7 (8.5%)   | <0.001                       |
| 201–500                                   | 285 (41.0%)    | 249 (40.6%)    | 36 (43.9%) |                              |

|                                        |                         |                         |                         |              |
|----------------------------------------|-------------------------|-------------------------|-------------------------|--------------|
| >500                                   | 179 (25.8%)             | 145 (23.7%)             | 34 (41.5%)              |              |
| Unknown                                | 36 (5.2%)               | 31 (5.0%)               | 5 (6.1%)                |              |
| <b>Year of diagnosis, median (IQR)</b> | <b>2012 (2009–2014)</b> | <b>2011 (2009–2014)</b> | <b>2012 (2010–2014)</b> | <b>0.057</b> |
| <b>Subtype, n (%)</b>                  |                         |                         |                         |              |
| A1                                     | 43 (6.2%)               | 41 (6.7%)               | 2 (2.4%)                | <0.001       |
| B                                      | 337 (48.5%)             | 282 (46.0%)             | 55 (67.1%)              |              |
| C                                      | 68 (9.8%)               | 64 (10.4%)              | 4 (4.9%)                |              |
| CRF02_AG                               | 74 (10.7%)              | 69 (11.3%)              | 5 (6.1%)                |              |
| CRF60_BC                               | 5 (0.7%)                | 0 (0.0%)                | 5 (6.1%)                |              |
| F1                                     | 61 (8.8%)               | 54 (8.8%)               | 7 (8.5%)                |              |
| Other                                  | 107 (15.3%)             | 103 (16.8%)             | 4 (4.9%)                |              |

<sup>a</sup>By Mann-Whitney test (for quantitative variables) and  $\chi^2$  test or Fisher's exact test (for categorical variables), as appropriate. *p* values <0.05 were considered statistically significant and were reported in bold. F: female; IVDU: intravenous drug user; M: male; MSM: men who have sex with men.

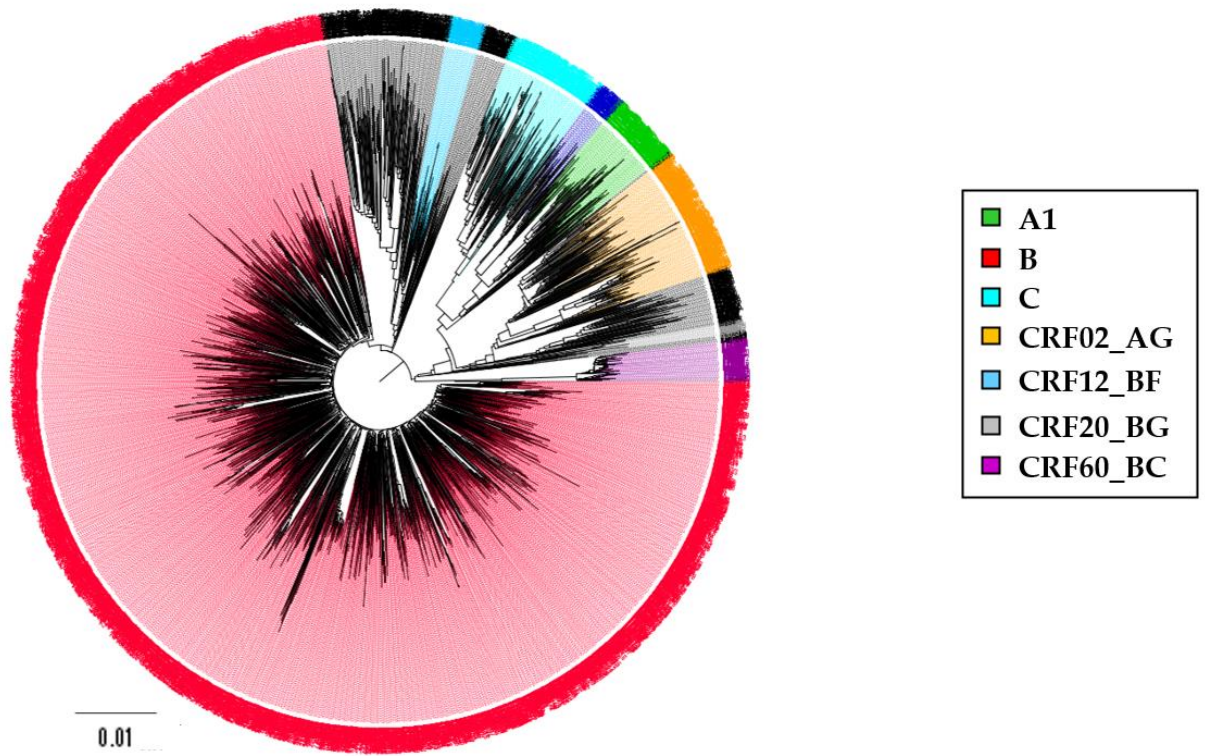

**Figure S1.** Phylogenetic tree of the 3499 *pol* sequences analysed and colored according to the most representative subtypes. Scale bar indicates estimated evolutionary distance of 0.01 substitution per position.

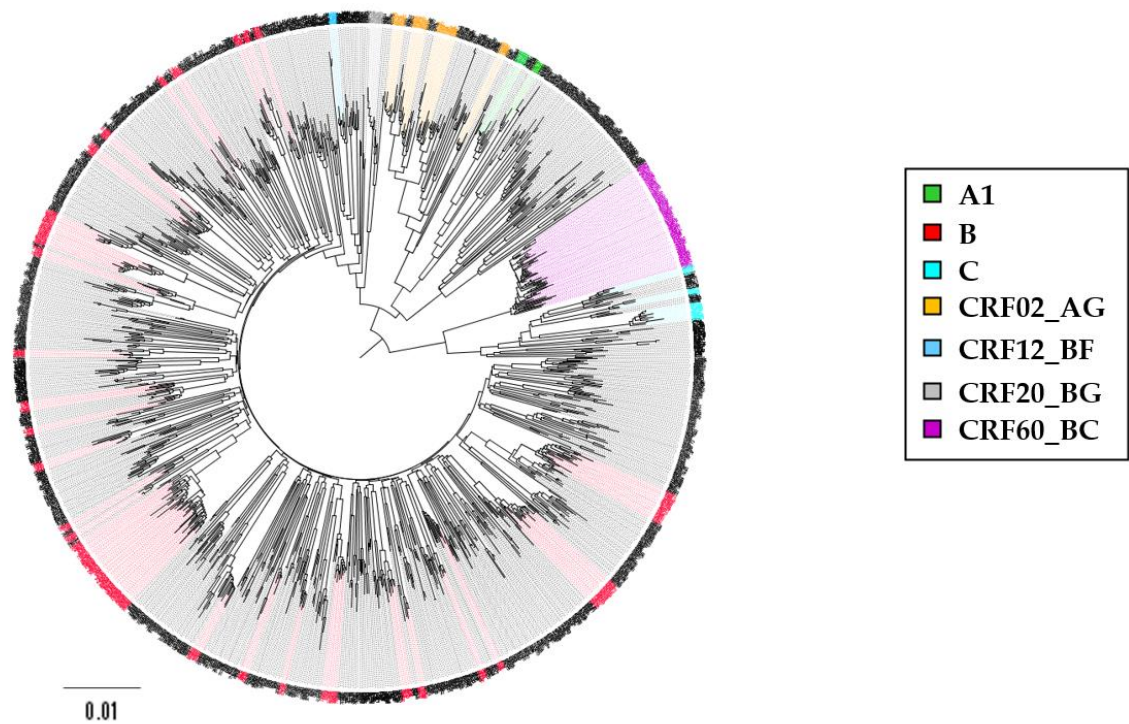

**Figure S2.** Phylogenetic tree of the 726 *pol* sequences involved in 228 molecular transmission clusters (MTCs). The 36 medium and the 6 large MTCs are colored according to HIV-1 subtype. The 186 small MTCs are shown in black. Scale bar indicates estimated evolutionary distance of 0.01 substitution per position.
